# Supplementary material for: Development and Validation of an Environmental Health Literacy Assessment Screening Tool for Domestic Well Owners: The Water Environmental Literacy Level Scale (WELLS)
Source: PubMed Central journal article supplement (PMC6427415; doi:10.3390/ijerph16050881), 2019-03-11
Supplement: ijerph-16-00881-s001.pdf [file ijerph-16-00881-s001.pdf]

## Supplementary Information

# Development and Validation of an Environmental Health Literacy Assessment Screening Tool for Domestic Well Owners: The Water Environmental Literacy Level Scale (WELLS)

Veronica L. Irvin \*, Diana Rohlman, Amelia Vaughan, Rebecca Amantia, Claire Berlin and Molly L. Kile

College of Public Health and Human Sciences, Oregon State University, Corvallis, OR 97330, USA;

Diana.Rohlman@oregonstate.edu (D.R.); Amelia.Vaughan@oregonstate.edu (A.V.);

Rebecca.Amantia@oregonstate.edu (R.A.); Berlinc@oregonstate.edu (C.B.);

Molly.Kile@oregonstate.edu (M.L.K.)

\* Correspondence: Veronica.Irvin@oregonstate.edu

**Table S1.** Specific wording and distribution for question and response option for the items in the Water Environmental Literacy Level scale as measured with an online adult sample, 2016

| Below please see the table describing how to interpret results from testing household water for arsenic, a heavy metal. Please answer the following questions based on information available in this table. | N (%)       |
|-------------------------------------------------------------------------------------------------------------------------------------------------------------------------------------------------------------|-------------|
| How many ppb of arsenic is safe for cooking?                                                                                                                                                                |             |
| a. 8                                                                                                                                                                                                        | 844 (97.1%) |
| b. 15                                                                                                                                                                                                       | 5 (0.6%)    |
| c. 50                                                                                                                                                                                                       | 10 (1.2%)   |
| d. 100                                                                                                                                                                                                      | 10 (1.2%)   |
| How many ppb of arsenic in water is safe for domestic use?                                                                                                                                                  |             |
| a. 450                                                                                                                                                                                                      | 43 (5.0%)   |
| b. 99                                                                                                                                                                                                       | 278 (32.0%) |
| c. Both a & b                                                                                                                                                                                               | 354 (40.7%) |
| d. Neither a nor b                                                                                                                                                                                          | 194 (22.3%) |
| Your well water test reports that your well water is not safe for drinking. What can you do?                                                                                                                |             |
| a. Boil water                                                                                                                                                                                               | 35 (4.0%)   |
| b. Drink bottled water                                                                                                                                                                                      | 818 (94.4%) |
| c. Ignore it                                                                                                                                                                                                | 1 (0.1%)    |
| d. Test well water every 5 years                                                                                                                                                                            | 13 (1.5%)   |
| Your water testing result shows arsenic at 50 ppb. How many milligrams (mg) is in one liter of your water?                                                                                                  |             |
| a. .05                                                                                                                                                                                                      | 668 (77.0%) |
| b. .5                                                                                                                                                                                                       | 138 (15.9%) |
| c. 5                                                                                                                                                                                                        | 31 (3.6%)   |
| d. 50                                                                                                                                                                                                       | 15 (3.6%)   |
| Pretend that your household water contains 15ppb of arsenic. Is it safe for you and your pets to drink?                                                                                                     |             |
| a. No                                                                                                                                                                                                       | 832 (95.7%) |
| a. Not enough information to answer this question                                                                                                                                                           | 12 (1.4%)   |

|                                                                                                                                                           |           |
|-----------------------------------------------------------------------------------------------------------------------------------------------------------|-----------|
| b. Not for me, but it is safe for my pet                                                                                                                  | 6 (0.7%)  |
| c. Yes, both my pet and me                                                                                                                                | 19 (2.2%) |
| If no, why not? Open-ended responses must have discussed some variant of contaminant level in table was linked to not being safe for drinking or by pets. |           |
| a. Incorrect response                                                                                                                                     | 44 (5%)   |
| b. Correct response                                                                                                                                       | 825 (95%) |

**Table S2.** Specific wording and distribution for question and response option for the items in the Newest Vital Sign scale as measured with an online adult sample, 2016.

| <b>Please see the sample ice cream nutritional label and answer the following questions based on information only available in this figure.</b>                                                                                                                 | <b>N (%)</b> |
|-----------------------------------------------------------------------------------------------------------------------------------------------------------------------------------------------------------------------------------------------------------------|--------------|
| If you eat the entire container, how many calories will you eat?                                                                                                                                                                                                |              |
| a. 250                                                                                                                                                                                                                                                          | 19 (2.2%)    |
| b. 500                                                                                                                                                                                                                                                          | 12 (1.4%)    |
| c. 750                                                                                                                                                                                                                                                          | 1 (0.1%)     |
| d. 1000                                                                                                                                                                                                                                                         | 836 (96.3%)  |
| If you are allowed to eat 60 grams of carbohydrates as a snack, how much ice cream could you have?                                                                                                                                                              |              |
| e. 1 cup                                                                                                                                                                                                                                                        | 296 (34.1)   |
| f. Half the container                                                                                                                                                                                                                                           | 115 (13.2%)  |
| g. Both a & b                                                                                                                                                                                                                                                   | 440 (50.6%)  |
| h. Neither a nor b                                                                                                                                                                                                                                              | 18 (2.1%)    |
| Your doctor asks you to reduce the amount of saturated fat in your diet. You usually have 42 g of saturated fat each day, which includes 1 serving of ice cream. If you stop eating ice cream, how many grams of saturated fat would you be consuming each day? |              |
| e. 9                                                                                                                                                                                                                                                            | 56 (6.5%)    |
| f. 24                                                                                                                                                                                                                                                           | 26 (3.0%)    |
| g. 33                                                                                                                                                                                                                                                           | 753 (86.9%)  |
| h. 42                                                                                                                                                                                                                                                           | 32 (3.7%)    |
| If you usually eat 2,500 calories in a day, what percentage of your daily value of calories will you be eating if you eat one serving?                                                                                                                          |              |
| e. 5%                                                                                                                                                                                                                                                           | 36 (4.1%)    |
| f. 10%                                                                                                                                                                                                                                                          | 773 (89.0%)  |
| g. 20%                                                                                                                                                                                                                                                          | 47 (5.4%)    |
| h. 50%                                                                                                                                                                                                                                                          | 13 (1.5%)    |
| For the next two questions, pretend that you are allergic to the following substances: penicillin, peanuts, latex gloves, and bee stings. Is it safe for you to eat this ice cream?                                                                             |              |
| d. Yes                                                                                                                                                                                                                                                          | 95 (10.9%)   |
| e. No                                                                                                                                                                                                                                                           | 774 (89.1%)  |
| If no, why not? Open-ended responses must have discussed peanut allergy in some context to be scored correct.                                                                                                                                                   |              |
| c. Incorrect response                                                                                                                                                                                                                                           | 102 (12%)    |
| d. Correct response                                                                                                                                                                                                                                             | 764 (88%)    |
